# Supplementary material for: Nurses’ knowledge on nosocomial infections preventive measures and its associated factors in Ghana: a cross-sectional study
Source: Springer Nature journal article supplement (doi:10.1186/s12913-023-09942-2), 2023-09-01
Supplement: MOESM1 [file 25992060]

## QUESTIONNAIRE

### SECTION 1: SOCIO-DEMOGRAPHIC CHARACTERISTICS

1. Sex: Male  Female

2. Age: .....

3. What is your highest level of education?

DIPLOMA  DEGREE  MASTERS

**Other** (*please specify*) .....

4. Year of working experience.....

5. Have you ever participated in any in-service training or workshop about nosocomial infection prevention or infection control? YES  NO

### SECTION 2: LEVEL OF KNOWLEDGE OF NOSOCOMIAL INFECTIONS

To complete this section, please circle the number which corresponds to how you agree with the given statement.

**1. Strongly disagree 2. Disagree 3. Agree 4. Strongly agree**

|          |                                                                                                                                      |          |          |          |          |
|----------|--------------------------------------------------------------------------------------------------------------------------------------|----------|----------|----------|----------|
| <b>6</b> | I am fully aware of nosocomial infections                                                                                            | <b>1</b> | <b>2</b> | <b>3</b> | <b>4</b> |
| <b>7</b> | Nosocomial infections are also known as hospital acquired infections                                                                 | <b>1</b> | <b>2</b> | <b>3</b> | <b>4</b> |
| <b>8</b> | Nosocomial infections occur during 48 to 72 hours after admission or during a specified period of 3 to 10 days after dismissal       | <b>1</b> | <b>2</b> | <b>3</b> | <b>4</b> |
| <b>9</b> | Nosocomial infections may be transmitted via medical equipment such as syringes, thermometers, needles, catheters, stethoscopes etc. | <b>1</b> | <b>2</b> | <b>3</b> | <b>4</b> |

|           |                                                                                                                                       |          |          |          |          |
|-----------|---------------------------------------------------------------------------------------------------------------------------------------|----------|----------|----------|----------|
| <b>10</b> | Nosocomial infections can be transmitted from one person to another                                                                   | <b>1</b> | <b>2</b> | <b>3</b> | <b>4</b> |
| <b>11</b> | Transmission of healthcare-associated pathogens takes place through direct and indirect contact, droplets, air, and a common vehicle. | <b>1</b> | <b>2</b> | <b>3</b> | <b>4</b> |
| <b>12</b> | Healthcare workers are immune to nosocomial infections                                                                                | <b>1</b> | <b>2</b> | <b>3</b> | <b>4</b> |
| <b>13</b> | Invasive procedures increase the risk of nosocomial infections                                                                        | <b>1</b> | <b>2</b> | <b>3</b> | <b>4</b> |

**SECTION 3: LEVEL OF KNOWLEDGE IN PREVENTIVE MEASURES OF  
NOSOCOMIAL INFECTION**

|           |                                                                                                                             |                 |  |
|-----------|-----------------------------------------------------------------------------------------------------------------------------|-----------------|--|
| <b>14</b> | Did you hear about infection prevention?                                                                                    | 1. Yes<br>2. No |  |
| <b>15</b> | Can gloves provide complete protection against acquiring or transmitting infections?                                        | 1. Yes<br>2. No |  |
| <b>16</b> | Can washing your hands with soap or an alcohol-based antiseptic decrease the risk of transmission of nosocomial infections? | 1. Yes<br>2. No |  |
| <b>17</b> | Is the use of an alcohol-based antiseptic for hand hygiene as effective as soap and water if hands are not visibly dirty?   | 1. Yes<br>2. No |  |
| <b>18</b> | Should gloves be worn if blood or body fluid exposure is anticipated?                                                       | 1. Yes<br>2. No |  |
| <b>19</b> | Is there a need to wash hands before doing procedures that do not involve bodily fluids?                                    | 1. Yes<br>2. No |  |
| <b>20</b> | Is there a need to wear the same pair of gloves for multiple patients as long as there is no visible contamination?         | 1. Yes<br>2. No |  |

|    |                                                                                                          |                                                                    |  |
|----|----------------------------------------------------------------------------------------------------------|--------------------------------------------------------------------|--|
| 21 | Do you know specific waste disposal buckets according to the level of their contamination?               | 1. Yes<br>2. No                                                    |  |
| 22 | Do you know the written formula for preparing 0.5% chlorine solution?                                    | 1. Yes<br>2. No                                                    |  |
| 23 | For how long should instrument or equipment be disinfected?                                              | 1. 10 minutes<br>2. 1hr<br>3. 24hrs<br>4. Other ( <i>specify</i> ) |  |
| 24 | Which of the following disease is transmitted by needle stick injury? (More than one answer is possible) | 1. HBV<br>2. HCV<br>3. TB<br>4. HIV<br>5. Other ( <i>specify</i> ) |  |

THANK YOU FOR PARTICIPATING!
